# Supplementary material
Source: publisher figshare collection journal article supplement (https://gsapubs.figshare.com/ndownloader/files/23293904)
Supplement: Supplementary file 1 [file 23293904]

## SUPPLEMENTARY MATERIAL

### **Northern Hemisphere forcing of the last deglaciation in southern Patagonia**

Daniel S. Murray, Anders E. Carlson\*, Brad S. Singer, Faron S. Anslow, Feng He, Marc Caffee, Shaun A. Marcott, Zhengyu Liu, Bette L. Otto-Bliesner

\*Corresponding author: acarlson@geology.wisc.edu, 608-262-1921

### ***Geologic Setting***

Glacial deposits in the southern Patagonia region were first delineated in the mapping work of Caldenius (1932); further details regarding this area in later studies relied mainly upon minimally limiting radiocarbon dates (Mercer, 1976; Wenzens, 1999). Rio Guanaco Valley is centered upon 50°S in Argentine Patagonia. Elevation in this area ranges from ~650 to 800 m above sea level, while the adjacent Lago Viedma and Lago Argentino outlet valley lakes directly drain the Southern Patagonian Icefield and have much lower surface elevations than the valley floor elevations in Rio Guanaco Valley (Figs. 1 and DR1). Glacial activity in this area is not linked directly to the Southern Patagonian Icefield, but glacier growth and retreat for both ice masses should respond to the same climate changes. There are numerous well-preserved moraines in both the main valley and in the surrounding tributary valleys in this area (Wenzens, 1999) (Fig. DR1). For this study, boulder samples were collected for cosmogenic radionuclide surface exposure dating from two glacial features in Rio Guanaco Valley, namely the La Sofia and San Jorge moraines, which are the local last glacial maximum moraines in the valley. Another set of samples was collected from the smaller Cerro Pintado moraine located in the Rio Manga Norte Valley tributary valley north of Rio Guanaco Valley (Fig. DR1). Sample locations are shown in Figure 1b.

### ***Cosmogenic Dating Methods***

Exposure ages were derived by measurement of the *in situ* concentration of  $^{10}\text{Be}$  within boulder surfaces from valley glacier moraines, accounting for the neutron and muon components of radionuclide production (Gosse and Phillips, 2001; Balco et al., 2008). A total of twenty-one samples were collected; all samples in this study have rhyolitic lithology. Six to nine samples were collected from each moraine, with coordinates recorded by GPS in the field (Table DR1). Boulder samples were chosen based on a preferred height (>1.0 m) to minimize the effects of shielding from topography or vegetation. All boulder faces were flat (<5° dip) and free from evidence of ventifaction. Samples were collected with hammer and chisel, while thicknesses were measured to account for the attenuation of cosmogenic  $^{10}\text{Be}$  concentration with depth (Gosse and Phillips, 2001). Sampled boulders were clast-supported in order to lessen the likelihood that post-depositional exhumation had occurred (Gosse and Phillips, 2001; Balco, 2011). Representative samples are shown in Figures DR3–DR9.

Sample processing was performed in the Cosmogenic Radionuclide Laboratory facilities at the University of Wisconsin-Madison's Department of Geoscience. Each sample was first

crushed and separated into the 425-841  $\mu\text{m}$  grain-size fraction range, rinsed, and then etched through repeated applications of HCl and HF acids until only quartz remained. Sample quartz purity was ensured by ICP-OES elemental analysis at the University of Colorado-Boulder. A procedural blank was made for each sample set in order to replicate all processing steps and potential contamination sources to which each sample may have been exposed. Five samples were processed in 2004 with blanks BL7 and BL8 (both with a  $^{10}\text{Be}/^9\text{Be}$  ratio of  $\sim 2.64 \times 10^{-14}$ ). The remaining sample sets were processed in 2010 with blanks B6 ( $^{10}\text{Be}/^9\text{Be} = 2.89 \times 10^{-15}$ ), B8 ( $^{10}\text{Be}/^9\text{Be} = 0.85 \times 10^{-15}$ ) and B9 ( $^{10}\text{Be}/^9\text{Be} = 1.25 \times 10^{-15}$ ). The UW-Madison laboratory has improved the process blank values via lowering the isotope ratios by more than one order of magnitude (average  $^{10}\text{Be}/^9\text{Be} = 1.67 \times 10^{-15}$ ). Data for procedural blanks and their corresponding sample sets are shown in Table DR1. A known quantity of  $^9\text{Be}$  carrier was added to facilitate AMS analysis of the small  $^{10}\text{Be}/^9\text{Be}$  ratios in each sample. Blanks BL7 and BL8 received a known concentration of a commercial  $^9\text{Be}$  carrier (1000  $\mu\text{g } ^9\text{Be}/\text{ml}$ ) whereas B6 received known concentration of the Merck carrier (1000  $\mu\text{g } ^9\text{Be}/\text{ml}$ ). Carrier addition to associated samples was adjusted based on sample weight. The sample sets corresponding to blanks B8 and B9 each received 1.0 ml of the OSU Blue carrier ( $240 \pm 3 \mu\text{g } ^9\text{Be}/\text{ml}$ ), regardless of sample mass. The  $^{10}\text{Be}/^9\text{Be}$  ratio for this carrier is  $\sim 4 \times 10^{-16}$ . All laboratory-based chemical data are summarized in Table DR1.

The pure sample quartz with carrier was then fully dissolved in concentrated HF over mild heat. Following several treatments of oxidization via  $\text{HClO}_4$ , all samples were passed through anion and cation exchange columns to remove elemental impurities (e.g., Fe, Ti, Al). This was followed by a series of pH-sensitive selective chemical precipitations and pH-8 water rinsing for boron isobar removal, resulting finally in a pure beryllium hydroxide precipitate. The  $\text{Be}(\text{OH})_2$  was transferred to a quartz vial for high-temperature dry-down and oxidation to  $\text{BeO}$ , which was finally mixed with a powdered niobium binder and loaded into the AMS target vessel by compaction. The samples were sent to Purdue University's Rare Isotope Measurement Laboratory (PRIME-Lab) for AMS measurement of the  $^{10}\text{Be}/^9\text{Be}$  ratios (Table DR1).

### ***Production Rate Calculation and Scaling***

The online CRONUS-Earth calculator (<http://hess.ess.washington.edu/math>) has traditionally used only production rates derived from a globally distributed set of calibration data sites (Balco et al., 2008). Regional production rates, however, have recently been developed. We utilize a production rate calibrated to the southern mid-latitudes of New Zealand (Putnam et al., 2010), derived by matching the cosmogenic  $^{10}\text{Be}$  concentrations in boulders from a debris flow deposit with radiocarbon-dated macrofossils of shrub-like vegetation from a soil horizon directly underneath the deposit. The reference  $^{10}\text{Be}$  production rate =  $3.75 \pm 0.08 \text{ atoms g}^{-1} \text{ yr}^{-1}$ , with a scaling error of  $< 2.5\%$  (Putnam et al., 2010; Balco et al., 2009). Justification for applying this reference production rate to southern Patagonia is based upon comparison between maximum- and minimum-limiting  $^{14}\text{C}$  ages and  $^{10}\text{Be}$  boulder concentration measurements both from the Puerto Banderas moraine near Lago Argentino (Fig. DR1) (Ackert et al., 2008; Kaplan et al., 2011). The original  $^{14}\text{C}$  dates indicate moraine deposition after  $12.9 \pm 0.9 \text{ ka}$  and before  $\sim 12.3 \text{ ka}$  (Strelin and Malignino, 2000). More recent  $^{14}\text{C}$  dating tightly constrains the moraine age to  $\sim 13 \text{ ka}$  with retreat before  $\sim 12.7 \text{ ka}$  (Strelin et al., 2011). By using the New Zealand production rate from Putnam et al. (2010), the  $^{10}\text{Be}$  boulder samples from the moraine of Ackert et al. (2008)

date to  $13.2 \pm 0.3$  ka, in agreement with the  $^{14}\text{C}$  constraints (Strelin et al., 2011). This agreement between the radiocarbon data and the cosmogenic radionuclide measurements for the Puerto Banderas moraine is maintained only by using the production rate established by Putnam et al. (2010). The globally-averaged production rate calculator (Balco et al., 2008) results in a significantly younger age of  $11.4 \pm 0.3$  ka that contradicts the  $^{14}\text{C}$  age constraints. Kaplan et al. (2011) obtained additional  $^{10}\text{Be}$  dates from the Puerto Banderas Moraine and on an in-board  $^{14}\text{C}$ -dated moraine that confirmed the applicability of this production rate to southern Patagonia.

Our cosmogenic  $^{10}\text{Be}$  concentrations and all relevant sample data (Table DR1) were entered into the online CRONUS-Earth online surface exposure age calculator. The results from both calculators described above are shown for comparison in Table DR2. Age results from all five scaling schemes (St: Lal (1991) and Stone (2000); De: Desilets et al. (2006); Du: Dunai (2001); Li: Lifton et al. (2005); and Lm: Lal (1991) and Stone (2000), time-dependent scheme) are also provided (Table DR3). Our interpretations reference the ages calculated with the Lm scaling scheme. The use of any one scaling scheme does not significantly affect the calculated ages or conclusions.

### ***Exposure Age Results***

Glacial retreat timing for each moraine was established by calculating the mean of each sample set, expressed with one standard error (S.E.) uncertainty (Figs. 1 and 2 in the main text). We use the straight mean because the geologic uncertainty (standard deviation of the boulder ages for each moraine) is equivalent to or greater than the analytical uncertainty of individual boulders (Bevington and Robinson, 2002). Using a weighted mean does not change our results or conclusions. The La Sofia moraine has an exposure age of  $19.7 \pm 1.1$  ka ( $n=6$ ; mean standard weighted deviates (MSWD)=4.5) whereas the adjacent San Jorge moraine 1.5 km upstream has an exposure age of  $18.9 \pm 0.4$  ka ( $n=9$ ; MSWD=1.4). The Cerro Pintado moraine has an error-weighted mean age of  $17.0 \pm 0.3$  ka ( $n=6$ ; MSWD=0.88). No outliers were excluded from the age calculations. Our Rio Guanaco Valley  $^{10}\text{Be}$  retreat chronology is older than the minimum-limiting  $^{14}\text{C}$  dates that show the San Jorge and Cerro Pintado moraines to be older than  $13.7 \pm 0.1$  ka and  $4.8 \pm 0.2$  ka, respectively (Wenzens, 1999). The relevant field and laboratory data needed to re-calculate the surface exposure ages are provided in Table DR1. Interpretations are discussed in the main text.

### ***Paleo-ELA Calculation***

Estimates for the paleo-equilibrium line altitude (ELA) values were approximated via inferred paleo-glacier extents and moraine landscape positions. The glacial extents were estimated by constraining the area of glacial presence to areas upstream of the respective terminal moraines, and then confining the estimated location of glacial margins inside the valley walls, with the upper accumulation zone filling the headwalls (Fig. 1). The paleo-glacial surface elevations were interpolated at each point across the valley by matching identical glacier margin elevation values derived from a digital elevation model (DEM) dataset. A smoothed surface approximating the paleo-glacier surface was constructed using the ESRI<sup>®</sup> ArcMap program. Glacier surface elevations were plotted in hypsometric curves versus the cumulative area below each elevation value. The elevation corresponding to the accumulation area ratio of  $0.65 \pm 0.05$

(Porter, 1975) (elevation with 35% of glacial area below the ELA) was used as an approximation of the paleo-ELA. Paleo-ELAs were converted into past temperature conditions by using a lapse rate of  $0.008\text{ }^{\circ}\text{C m}^{-1}$  (Hulton et al., 1994; Takeuchi et al., 1996; Stuefer et al., 2007). In order to tie the paleo-ELA estimates to modern conditions, we calculated the averaged present-day ELA value from a set of 12 existing cirque glaciers positioned on the crest of the pre-Cordilleran mountain range west of Rio Guanaco Valley (Fig. 1b); this present-day ELA value is estimated to be  $1750\pm 200\text{ m}$  (one standard deviation uncertainty), and was also computed via the AAR method. The paleo-ELA results corresponding to conditions during each respective moraine deposition are discussed in the main text.

### *Climate Model Simulations for 50°S*

We use the climate output for 50°S, southern Patagonia from a fully-coupled atmosphere-ocean global circulation model (AOGCM) to calculate deglacial changes in ELA from the LGM (Fig. 3d). The National Center for Atmospheric Research (NCAR) CCSM3 model simulation starts from an equilibrium LGM state that incorporates orbital variations, known greenhouse gas concentrations (Joos and Spahni, 2008), and ice sheet size (Liu et al., 2009). The AOGCM was run 22 to 14 ka with perturbation by a varying meltwater flux from the melting Northern Hemisphere ice sheets discharged into the North Atlantic Ocean 19–17 ka (Liu et al., 2009). This results in surface cooling in the North Atlantic with simultaneous warming in the southern mid to high-latitudes, consistent with a bipolar thermal seesaw teleconnection between the Northern and Southern Hemispheres related to reduced meridional overturning in the North Atlantic (Crowley, 1992; Stocker, 1998). The modeled range of temperature change across southern South America from 19 to 17 ka is  $1\text{--}3^{\circ}\text{C}$ , a warming that is explained solely by the meltwater flux into the North Atlantic because atmospheric greenhouse gas forcings were not initiated until 17 ka (Liu et al., 2009), in agreement with most recent greenhouse gas chronology (Lemieux-Dudon et al., 2010).

The transient AOGCM climate for Patagonia, 50°S, was converted to a relative change in ELA due to austral summer temperatures (December through February) by using the temperature lapse rate of  $0.008\text{ }^{\circ}\text{C m}^{-1}$  (Hulton et al., 1994; Takeuchi et al., 1996; Stuefer et al., 2007), as well as ELA change due to precipitation ( $-0.0083\text{ mm day}^{-1}\text{ m}^{-1}$ ) based on the Southern Patagonian Icefield modeling of Hulton et al. (1994) (Fig. 3d). This modeled change in ELA is an estimate made relative to a zero value established from the 2 kyr average of relatively constant glacial-state conditions from 22–20 ka. We also compared our ELA changes with predicted ELA changes from a transient CCSM3 simulation run from 22 to 17 ka but with only changes in orbital parameters to test the effects of spring-summer insolation (Stott et al., 2007).

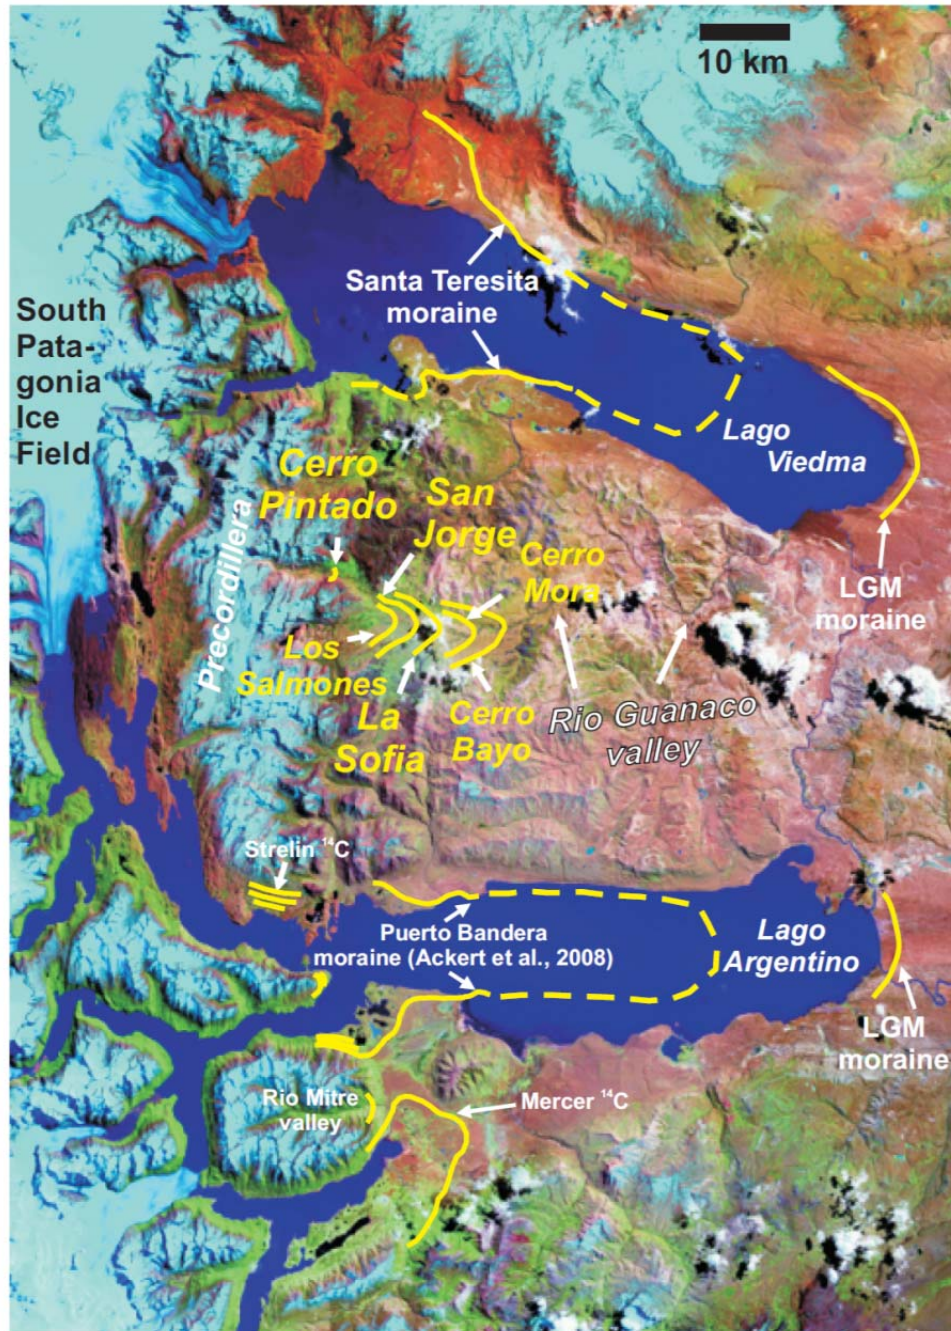

**Figure DR1: Map of the Rio Guanaco Valley study area.** LANDSAT Image showing known moraine features are shown with solid yellow lines; inferred moraine locations are shown by dashed lines (Wenzens, 1999).

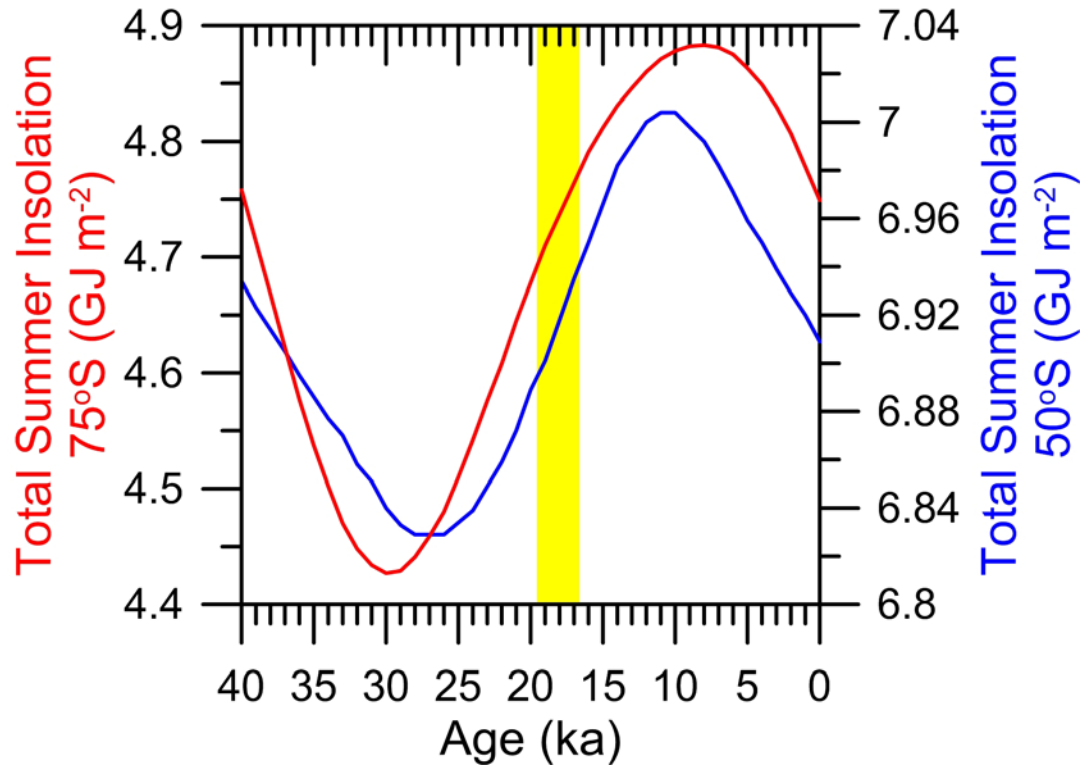

**Figure DR2:** Changes in total austral summer length as a reflection of summer duration with a cut off of  $250 \text{ W m}^{-2}$  (Huybers and Denton, 2008). Red is for  $75^\circ\text{S}$ , blue for  $50^\circ\text{S}$ . Yellow bar denotes the retreat of ice in Rio Guanaco Valley.



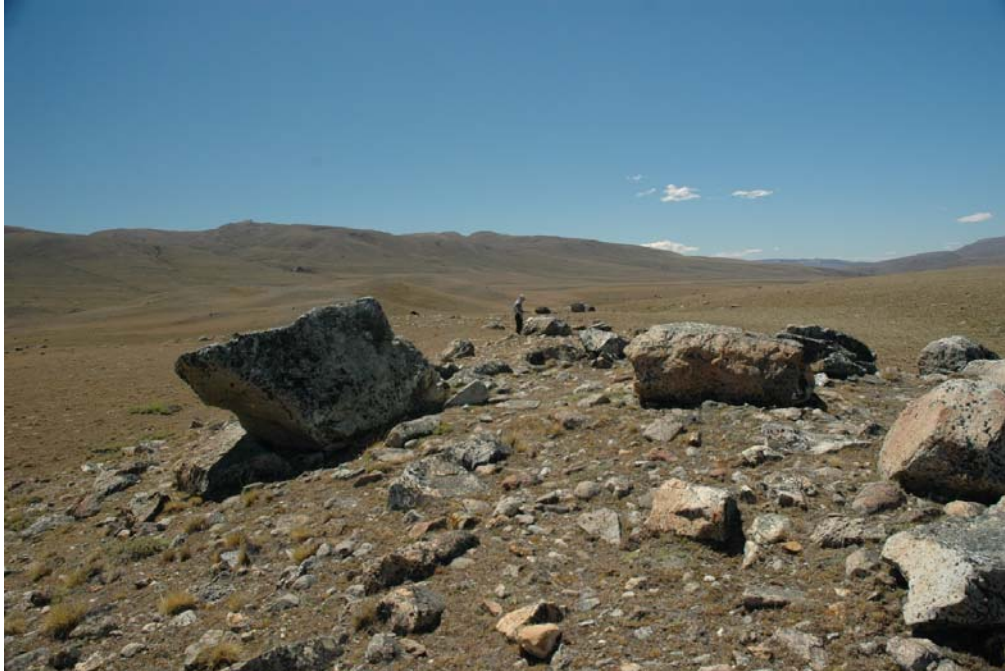

**Figure DR3:** View along crest of La Sofia moraine, facing north.

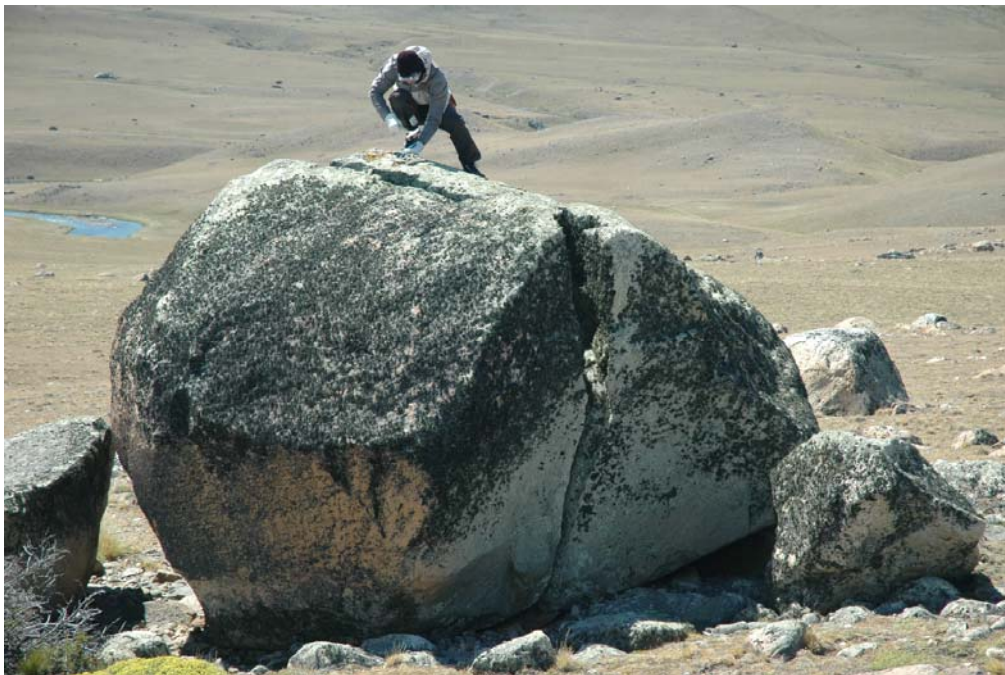

**Figure DR4:** Representative boulder (RGV-10-20) from the crest of the La Sofia moraine in Rio Guanaco Valley.

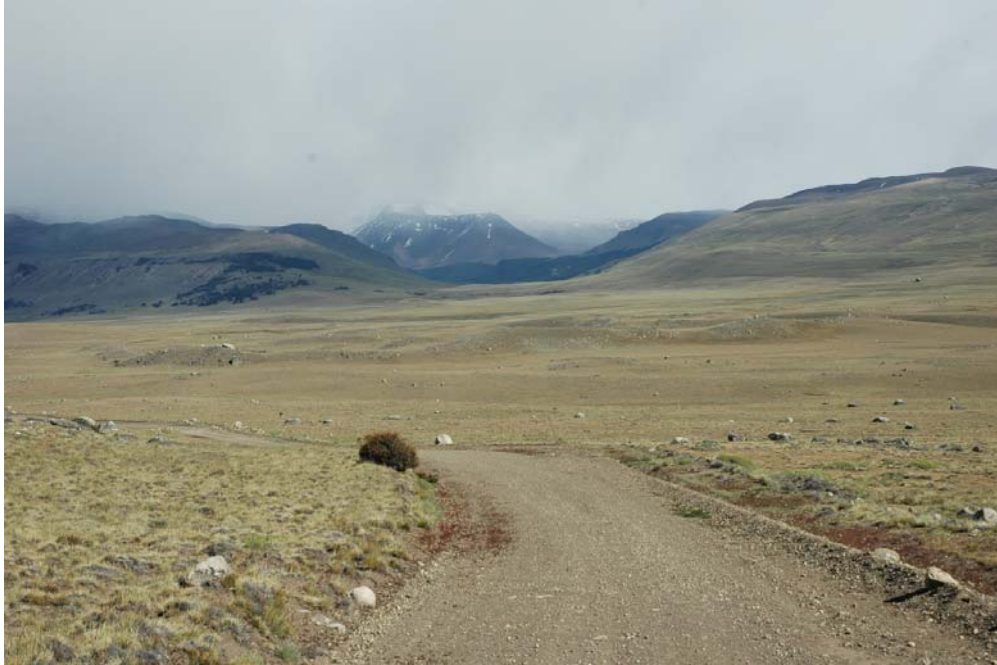

**Figure DR5:** View of the southern flank of the San Jorge moraine arc as it spans the Rio Guanaco Valley, facing north-northwest. Moraine feature spans the center portion of the photograph. The mouth of Rio Manga Norte Valley as it enters into Rio Guanaco Valley is seen in the center background.

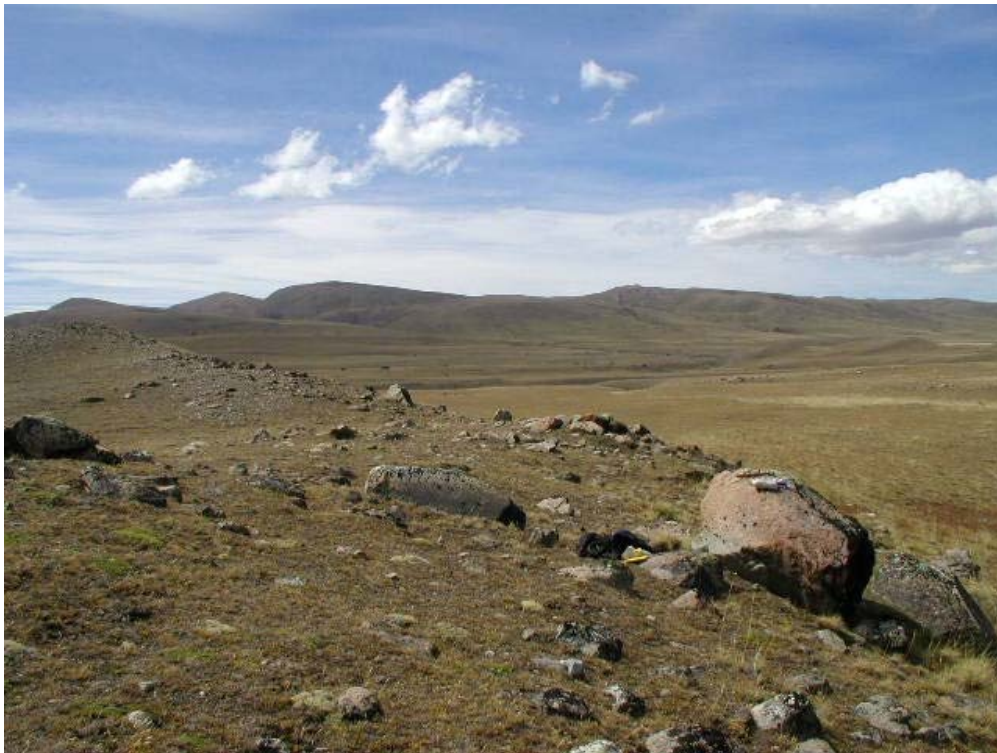

**Figure DR6:** View of San Jorge moraine crest, arcing to the left from foreground to background, facing north-northeast.



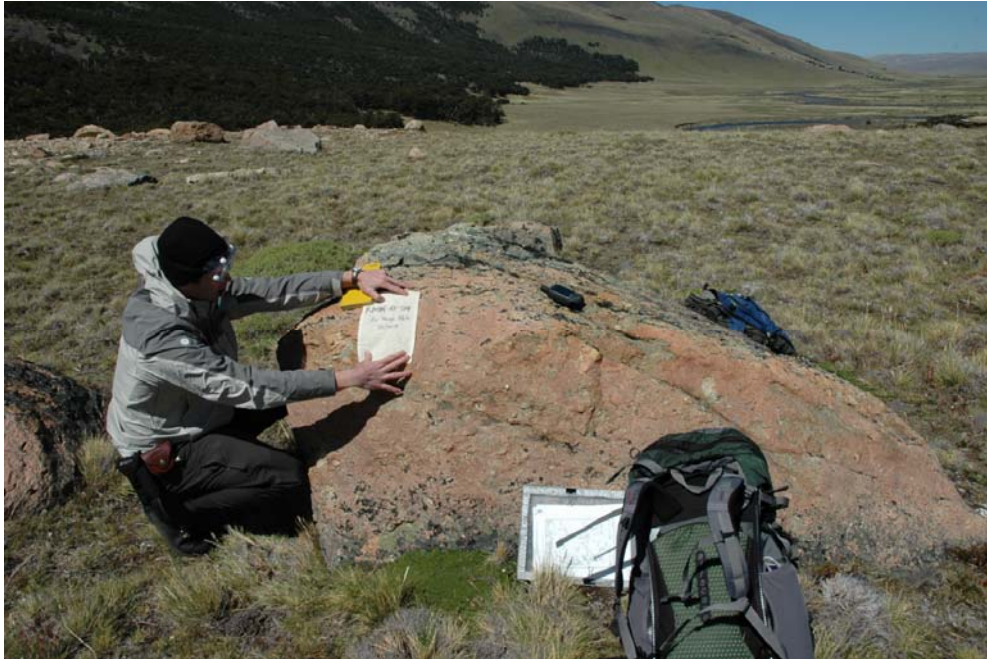

**Figure DR7:** Representative sample boulder (RMN-10-04) from the Cerro Pintado moraine in Rio Manga Norte Valley.

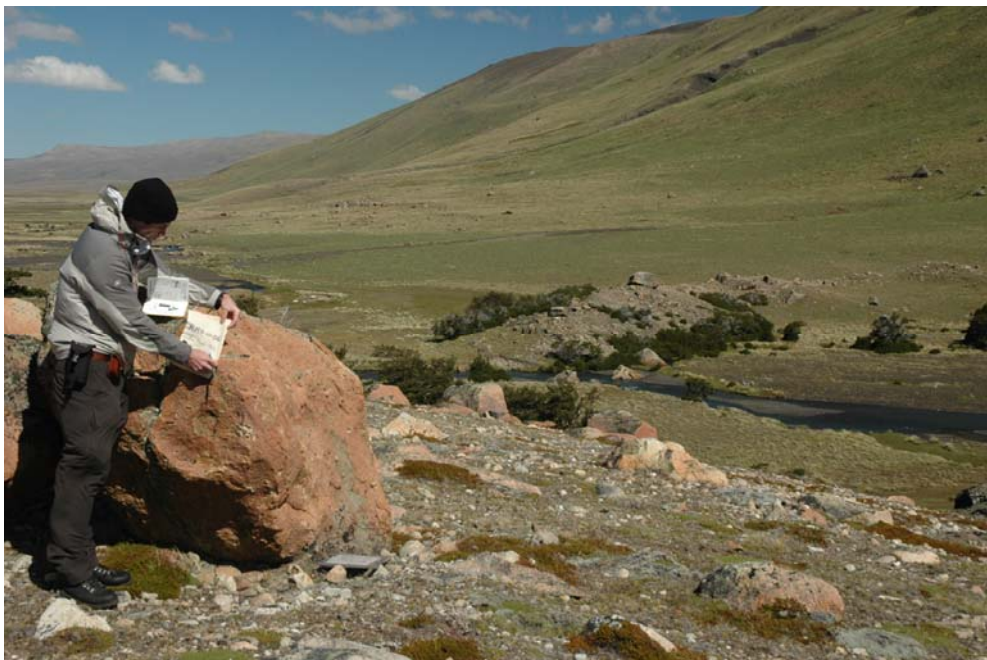

**Figure DR8:** View of Cerro Pintado moraine and representative boulder sample, facing south-southeast. Note the moraine spans nearly the entire valley, and is incised by the Rio Manga Norte. Downstream (left) leads to the main Rio Guanaco Valley.

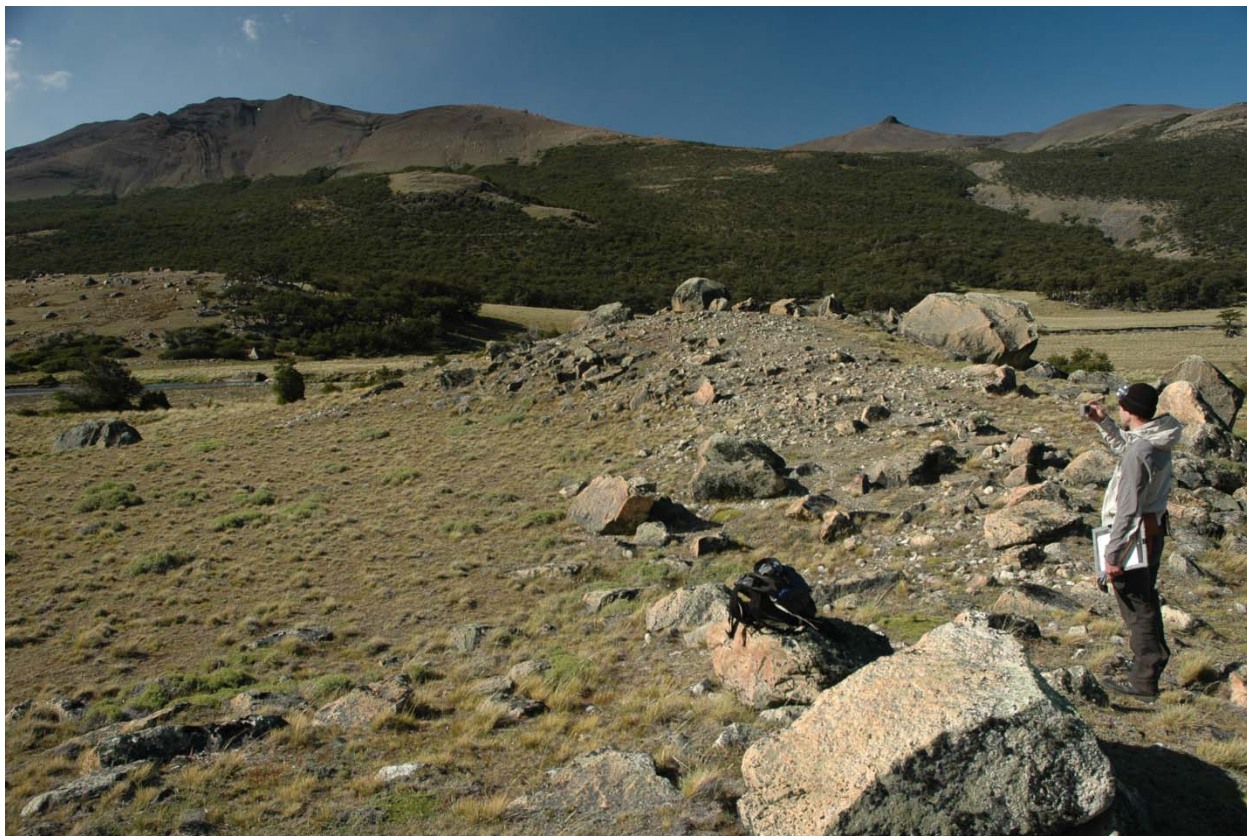

**Supplementary Figure DR9:** View of Cerro Pintado moraine (Rio Manga Norte Valley) facing north-northeast.

**Supplementary Table DR1: Field and laboratory data for  $^{10}\text{Be}$  surface exposure age calculations**

| Sample ID            | Latitude (°S) | Longitude (°W)                     | Elevation (m)    | Height (cm)                      | Sample thickness (cm)              | Lith.    | Qtz. (%) | Mass of quartz (g) | Shielding factor | $^{10}\text{Be}$ standard <sup>a</sup> | Blank | $^{10}\text{Be}$ conc. ( $10^6$ ) | $^{10}\text{Be}$ uncertainty ( $10^3$ ) |
|----------------------|---------------|------------------------------------|------------------|----------------------------------|------------------------------------|----------|----------|--------------------|------------------|----------------------------------------|-------|-----------------------------------|-----------------------------------------|
| <i>La Sofia</i>      |               |                                    |                  |                                  |                                    |          |          |                    |                  |                                        |       |                                   |                                         |
| RGV-10-10            | 49.925        | 72.719                             | 774              | 240                              | 2                                  | Rhyolite | 10-15    | 21.543             | 0.999996         | 07KNSTD                                | B8    | 14.12                             | 8.00                                    |
| RGV-10-16            | 49.919        | 72.701                             | 656              | 110                              | 1.9                                | Rhyolite | 5-10     | 20.479             | 0.999746         | 07KNSTD                                | B9    | 14.82                             | 8.10                                    |
| RGV-10-18            | 49.920        | 72.704                             | 700              | 250                              | 1.5                                | Rhyolite | 5-10     | 21.541             | 0.999877         | 07KNSTD                                | B8    | 13.71                             | 6.38                                    |
| RGV-10-20            | 49.921        | 72.707                             | 720              | 300                              | 1                                  | Rhyolite | 10       | 20.991             | 0.999879         | 07KNSTD                                | B8    | 16.42                             | 10.7                                    |
| RGV-10-21            | 49.922        | 72.708                             | 733              | 60                               | 1.2                                | Rhyolite | 5-10     | 20.558             | 0.999879         | 07KNSTD                                | B8    | 14.17                             | 8.35                                    |
| RGV-10-22            | 49.924        | 72.714                             | 767              | 150                              | 1.4                                | Rhyolite | 15       | 23.589             | 0.999996         | 07KNSTD                                | B8    | 18.92                             | 9.55                                    |
| <i>San Jorge</i>     |               |                                    |                  |                                  |                                    |          |          |                    |                  |                                        |       |                                   |                                         |
| RGV-04-01            | 49.913        | 72.728                             | 672              | 145                              | 2                                  | Rhyolite | 15-20    | 32.7248            | 0.999797         | KNSTD                                  | BL8   | 15.76                             | 10.1                                    |
| RGV-04-03            | 49.914        | 72.728                             | 680              | 177                              | 2.5                                | Rhyolite | 15-20    | 38.9325            | 0.999842         | NIST_30600                             | BL7   | 15.39                             | 9.17                                    |
| RGV-04-04A           | 49.914        | 72.720                             | 671              | 140                              | 3                                  | Rhyolite | 20       | 38.5150            | 0.999803         | NIST_30600                             | BL7   | 15.12                             | 11.0                                    |
| RGV-04-05            | 49.917        | 72.730                             | 690              | 95                               | 2.5                                | Rhyolite | 15       | 39.2948            | 0.999789         | NIST_30600                             | BL7   | 16.62                             | 9.14                                    |
| RGV-04-07            | 49.917        | 72.721                             | 698              | 2.0                              | 2                                  | Rhyolite | 10-15    | 30.7075            | 0.999748         | NIST_30600                             | BL7   | 15.13                             | 23.1                                    |
| RGV-04-02            | 49.914        | 72.720                             | 670              | 3.5                              | 3                                  | Rhyolite | 10       | 40.010             | 0.9998           | 07KNSTD                                | B6    | 14.80                             | 10.5                                    |
| RGV-04-06            | 49.914        | 72.720                             | 678              | 85                               | 2                                  | Rhyolite | 10-15    | 40.336             | 0.999834         | 07KNSTD                                | B6    | 13.43                             | 6.65                                    |
| RGV-04-08            | 49.917        | 72.721                             | 693              | 100                              | 2.5                                | Rhyolite | 10-15    | 40.164             | 0.99974          | 07KNSTD                                | B6    | 12.28                             | 7.23                                    |
| RGV-04-09            | 49.916        | 72.722                             | 691              | 83                               | 3                                  | Rhyolite | 10       | 40.145             | 0.99972          | 07KNSTD                                | B6    | 14.43                             | 7.24                                    |
| <i>Cerro Pintado</i> |               |                                    |                  |                                  |                                    |          |          |                    |                  |                                        |       |                                   |                                         |
| RMN-10-01            | 49.857        | 72.837                             | 758              | 150                              | 1.5                                | Rhyolite | 10       | 30.530             | 0.994347         | 07KNSTD                                | B8    | 13.22                             | 5.11                                    |
| RMN-10-04            | 49.85         | 72.835                             | 765              | 100                              | 2.5                                | Rhyolite | 10       | 30.321             | 0.992884         | 07KNSTD                                | B8    | 13.46                             | 5.15                                    |
| RMN-10-05            | 49.858        | 72.835                             | 776              | 250                              | 2.6                                | Rhyolite | 10-15    | 30.245             | 0.989931         | 07KNSTD                                | B8    | 13.73                             | 6.96                                    |
| RMN-10-06            | 49.859        | 72.834                             | 754              | 150                              | 2                                  | Rhyolite | 10       | 30.750             | 0.989931         | 07KNSTD                                | B9    | 12.93                             | 7.10                                    |
| RMN-10-07            | 49.859        | 72.834                             | 750              | 200                              | 2.3                                | Rhyolite | 10-15    | 30.872             | 0.99509          | 07KNSTD                                | B9    | 13.06                             | 5.36                                    |
| RMN-10-08            | 49.861        | 72.832                             | 742              | 300                              | 1.3                                | Rhyolite | 10-15    | 30.387             | 0.992027         | 07KNSTD                                | B9    | 14.34                             | 5.69                                    |
|                      |               |                                    |                  |                                  |                                    |          |          |                    |                  |                                        |       |                                   |                                         |
|                      |               | Blank $^{10}\text{Be}/^9\text{Be}$ | Error            |                                  |                                    |          |          |                    |                  |                                        |       |                                   |                                         |
| Blank BL7            |               | 2.64 E-14                          | 3.88 E-15        |                                  |                                    |          |          |                    |                  |                                        |       |                                   |                                         |
| Blank BL8            |               | 2.64 E-14                          | 4.70 E-15        |                                  |                                    |          |          |                    |                  |                                        |       |                                   |                                         |
| Blank B6             |               | <b>2.89 E-15</b>                   | <b>0.95 E-15</b> |                                  |                                    |          |          |                    |                  |                                        |       |                                   |                                         |
| Blank B8             |               | <b>0.86 E-15</b>                   | <b>1.22 E-15</b> |                                  |                                    |          |          |                    |                  |                                        |       |                                   |                                         |
| Blank B9             |               | <b>1.25 E-15</b>                   | <b>1.08 E-15</b> | <b>Range (B6-B9) = 2.03 E-15</b> | <b>Average (B6-B9) = 1.67 E-15</b> |          |          |                    |                  |                                        |       |                                   |                                         |

<sup>a</sup>All samples underwent accelerator mass spectrometric analysis of the  $^{10}\text{Be}/^9\text{Be}$  ratios at Purdue's Rare Isotope Measurement laboratory (PRIME-Lab) according to the following AMS beryllium standardizations, as noted: NIST\_30600 (NIST SRM4325 with an assumed isotope ratio of  $3.0 \times 10^{-11}$ ), KNSTD, and 07KNSTD.

**Table DR2:** Comparison of calculated surface exposure ages according to  $^{10}\text{Be}$  reference production rate calculator and erosion rate.

|                              | Global production rate <sup>a</sup><br>Zero erosion |                                           | Global production rate<br>Erosion = 1.4 mm/k.y. <sup>c</sup> |                              | SH production rate <sup>b</sup><br>Zero erosion |                              | SH production rate<br>Erosion = 1.4 mm/k.y. |                              |
|------------------------------|-----------------------------------------------------|-------------------------------------------|--------------------------------------------------------------|------------------------------|-------------------------------------------------|------------------------------|---------------------------------------------|------------------------------|
|                              | Age                                                 | Uncertainty <sup>c</sup><br>(1 std-error) | Age                                                          | Uncertainty<br>(1 std-error) | Age                                             | Uncertainty<br>(1 std-error) | Age                                         | Uncertainty<br>(1 std-error) |
| <i>La Sofia moraine</i>      |                                                     |                                           |                                                              |                              |                                                 |                              |                                             |                              |
| RGV-10-10                    | 14664                                               | 813                                       | 14913                                                        | 841                          | 17069                                           | 948                          | 17406                                       | 986                          |
| RGV-10-16                    | 16999                                               | 912                                       | 17334                                                        | 949                          | 19789                                           | 1063                         | 20244                                       | 1113                         |
| RGV-10-18                    | 15099                                               | 689                                       | 15363                                                        | 713                          | 17575                                           | 803                          | 17932                                       | 836                          |
| RGV-10-20                    | 17694                                               | 1130                                      | 18058                                                        | 1177                         | 20602                                           | 1318                         | 21097                                       | 1382                         |
| RGV-10-21                    | 15141                                               | 874                                       | 15406                                                        | 905                          | 17624                                           | 1019                         | 17984                                       | 1061                         |
| RGV-10-22                    | 19641                                               | 974                                       | 20092                                                        | 1019                         | 22871                                           | 1136                         | 23482                                       | 1198                         |
| n = 6                        | 16.5 ± 0.9                                          | MSWD = 4.5                                | 16.9 ± 0.9                                                   | MSWD = 4.5                   | 19.3 ± 1.0                                      | MSWD = 4.5                   | 19.7 ± 1.1 ka<br>(1 std-error)              | MSWD = 4.5                   |
| <i>San Jorge moraine</i>     |                                                     |                                           |                                                              |                              |                                                 |                              |                                             |                              |
| RGV-04-01                    | 16295                                               | 1024                                      | 16603                                                        | 1063                         | 18968                                           | 1194                         | 19386                                       | 1247                         |
| RGV-04-03                    | 16035                                               | 937                                       | 16333                                                        | 972                          | 18665                                           | 1092                         | 19069                                       | 1140                         |
| RGV-04-04A                   | 15779                                               | 1125                                      | 16067                                                        | 1167                         | 18366                                           | 1312                         | 18757                                       | 1368                         |
| RGV-04-05                    | 17237                                               | 930                                       | 17582                                                        | 968                          | 20067                                           | 1084                         | 20536                                       | 1136                         |
| RGV-04-07                    | 15556                                               | 2328                                      | 15836                                                        | 2412                         | 18107                                           | 2713                         | 18487                                       | 2828                         |
| RGV-04-02                    | 16926                                               | 1178                                      | 17258                                                        | 1225                         | 19704                                           | 1373                         | 20155                                       | 1437                         |
| RGV-04-06                    | 15139                                               | 734                                       | 15404                                                        | 760                          | 17620                                           | 856                          | 17979                                       | 891                          |
| RGV-04-08                    | 13727                                               | 791                                       | 13944                                                        | 816                          | 15977                                           | 922                          | 16271                                       | 956                          |
| RGV-04-09                    | 16211                                               | 798                                       | 16516                                                        | 828                          | 18871                                           | 930                          | 19284                                       | 971                          |
| n = 9                        | 15.9 ± 0.4                                          | MSWD = 1.4                                | 16.2 ± 0.4                                                   | MSWD = 1.4                   | 18.5 ± 1.4                                      | MSWS = 1.4                   | 18.9 ± 0.4 ka<br>(1 std-error)              | MSWD = 1.4                   |
| <i>Cerro Pintado moraine</i> |                                                     |                                           |                                                              |                              |                                                 |                              |                                             |                              |
| RMN-10-01                    | 13948                                               | 528                                       | 14172                                                        | 545                          | 16235                                           | 615                          | 16539                                       | 638                          |
| RMN-10-04                    | 14251                                               | 534                                       | 14486                                                        | 552                          | 16588                                           | 623                          | 16905                                       | 647                          |
| RMN-10-05                    | 14455                                               | 718                                       | 14697                                                        | 742                          | 16825                                           | 837                          | 17152                                       | 869                          |
| RMN-10-06                    | 13803                                               | 743                                       | 14023                                                        | 766                          | 16066                                           | 866                          | 16364                                       | 898                          |
| RMN-10-07                    | 13956                                               | 561                                       | 14181                                                        | 579                          | 16244                                           | 654                          | 16548                                       | 679                          |
| RMN-10-08                    | 15347                                               | 597                                       | 15619                                                        | 618                          | 17863                                           | 696                          | 18233                                       | 725                          |
| n = 6                        | 14.3 ± 0.3                                          | MSWD = 0.88                               | 14.5 ± 0.3                                                   | MSWD = 0.88                  | 16.6 ± 0.3                                      | MSWD = 0.88                  | 17.0 ± 0.3 ka<br>(1 std-error)              | MSWD = 0.88                  |

<sup>a</sup>Global production rate refers to the conventional global production rate calculator from Balco et al.(2008); <sup>b</sup>SH production rate refers to the reference production rate established for the southern mid-latitudes of New Zealand by Putnam et al.(2010); <sup>c</sup>erosion rate is assumed to equal 1.4 mm/k.y. (Douglass et al., 2006). All ages were calculated with the online CRONUS-Earth surface exposure age calculator using the time-dependent Lal (1991)/Stone (2000) scaling scheme results (Lm). Individual exposure age outputs from the CRONUS Earth online calculator are expressed with one standard-error uncertainty. Final inverse-variance weighted-average ages are also shown with one standard-error uncertainty. <sup>c</sup>All input errors represent the internal uncertainty of each sample (one standard-error).



**Table DR3:** Surface exposure age results and cosmogenic radionuclide scaling schemes.

|                              | <u>Lal/Stone<sup>a</sup></u> |                                        | <u>Desilets et al.<sup>b</sup></u> |                           | <u>Dunai<sup>c</sup></u> |                           | <u>Lifton et al.<sup>d</sup></u> |                           | <u>L/S time-dependent<sup>e</sup></u> |                           |
|------------------------------|------------------------------|----------------------------------------|------------------------------------|---------------------------|--------------------------|---------------------------|----------------------------------|---------------------------|---------------------------------------|---------------------------|
| <i>La Sofia moraine</i>      | Age                          | Uncertainty <sup>f</sup> (1 std-error) | Age                                | Uncertainty (1 std-error) | Age                      | Uncertainty (1 std-error) | Age                              | Uncertainty (1 std-error) | Age                                   | Uncertainty (1 std-error) |
| RGV-10-10                    | 16996                        | 986                                    | 17652                              | 986                       | 17838                    | 986                       | 17474                            | 986                       | 17406                                 | 986                       |
| RGV-10-16                    | 19784                        | 1113                                   | 20561                              | 1113                      | 20798                    | 1113                      | 20346                            | 1113                      | 20244                                 | 1113                      |
| RGV-10-18                    | 17512                        | 836                                    | 18209                              | 836                       | 18408                    | 836                       | 18033                            | 836                       | 17932                                 | 836                       |
| RGV-10-20                    | 20626                        | 1382                                   | 21400                              | 1382                      | 21644                    | 1382                      | 21150                            | 1382                      | 21097                                 | 1382                      |
| RGV-10-21                    | 17564                        | 1061                                   | 18251                              | 1061                      | 18448                    | 1061                      | 18067                            | 1061                      | 17984                                 | 1061                      |
| RGV-10-22                    | 22981                        | 1198                                   | 23790                              | 1198                      | 24060                    | 1198                      | 23461                            | 1198                      | 23482                                 | 1198                      |
|                              | 19.2 ± 1.0                   | MSWD = 4.4                             | 20.0 ± 1.1                         | MSWD = 4.6                | 20.2 ± 1.1               | MSWD = 4.7                | 19.8 ± 1.0                       | MSWD = 4.4                | 19.7 ± 1.1 ka (1 std-error)           | MSWD = 4.5                |
| <i>San Jorge moraine</i>     | Age                          | Uncertainty (1 std-error)              | Age                                | Uncertainty (1 std-error) | Age                      | Uncertainty (1 std-error) | Age                              | Uncertainty (1 std-error) | Age                                   | Uncertainty (1 std-error) |
| RGV-04-01                    | 18940                        | 1247                                   | 19691                              | 1247                      | 19915                    | 1247                      | 19494                            | 1247                      | 19386                                 | 1247                      |
| RGV-04-03                    | 18630                        | 1140                                   | 19369                              | 1140                      | 19587                    | 1140                      | 19177                            | 1140                      | 19069                                 | 1140                      |
| RGV-04-04A                   | 18323                        | 1368                                   | 19052                              | 1368                      | 19265                    | 1368                      | 18866                            | 1368                      | 18757                                 | 1368                      |
| RGV-04-05                    | 20072                        | 1136                                   | 20850                              | 1136                      | 21090                    | 1136                      | 20625                            | 1136                      | 20536                                 | 1136                      |
| RGV-04-07                    | 18057                        | 2828                                   | 18777                              | 2828                      | 18985                    | 2828                      | 18594                            | 2828                      | 18487                                 | 2828                      |
| RGV-04-02                    | 19698                        | 1437                                   | 20466                              | 1437                      | 20701                    | 1437                      | 20250                            | 1437                      | 20155                                 | 1437                      |
| RGV-04-06                    | 17558                        | 891                                    | 18264                              | 891                       | 18465                    | 891                       | 18092                            | 891                       | 17979                                 | 891                       |
| RGV-04-08                    | 15878                        | 956                                    | 16532                              | 956                       | 16707                    | 956                       | 16394                            | 956                       | 16271                                 | 956                       |
| RGV-04-09                    | 18842                        | 971                                    | 19579                              | 971                       | 19798                    | 971                       | 19377                            | 971                       | 19284                                 | 971                       |
|                              | 18.4 ± 0.4                   | MSWD = 1.4                             | 19.2 ± 0.4                         | MSWD = 1.5                | 19.4 ± 0.5               | MSWD = 1.5                | 19.0 ± 0.4                       | MSWD = 1.4                | 18.9 ± 0.4 ka (1 std-error)           | MSWD = 1.4                |
| <i>Cerro Pintado moraine</i> | Age                          | Uncertainty (1 std-error)              | Age                                | Uncertainty (1 std-error) | Age                      | Uncertainty (1 std-error) | Age                              | Uncertainty (1 std-error) | Age                                   | Uncertainty (1 std-error) |
| RMN-10-01                    | 16149                        | 638                                    | 16783                              | 638                       | 16956                    | 638                       | 16631                            | 638                       | 16539                                 | 638                       |
| RMN-10-04                    | 16511                        | 647                                    | 17151                              | 647                       | 17329                    | 647                       | 16989                            | 647                       | 16905                                 | 647                       |
| RMN-10-05                    | 16754                        | 869                                    | 17396                              | 869                       | 17577                    | 869                       | 17227                            | 869                       | 17152                                 | 869                       |
| RMN-10-06                    | 15976                        | 898                                    | 16608                              | 898                       | 16779                    | 898                       | 16460                            | 898                       | 16364                                 | 898                       |
| RMN-10-07                    | 16158                        | 679                                    | 16795                              | 679                       | 16969                    | 679                       | 16644                            | 679                       | 16548                                 | 679                       |
| RMN-10-08                    | 17817                        | 725                                    | 18500                              | 725                       | 18700                    | 725                       | 18313                            | 725                       | 18233                                 | 725                       |
|                              | 16.6 ± 0.3                   | MSWD = 0.85                            | 17.2 ± 0.3                         | MSWD = 0.90               | 17.4 ± 0.3               | MSWD = 0.93               | 17.0 ± 0.3                       | MSWD = 0.86               | 17.0 ± 0.3 ka (1 std-error)           | MSWD = 0.88               |

<sup>a</sup>Constant rate Lal (1991) and Stone (2000) scheme; <sup>b</sup>Desilets et al. (2006); <sup>c</sup>Dunai (2001); <sup>d</sup>Lifton et al. (2005); <sup>e</sup>modified Lal (1991)/Stone (2000) scaling scheme based on time-dependent magnetic field variations Nishiizumi et al. (1989), used in this study. <sup>f</sup>Input errors represent internal sample uncertainties (1 std-error). The final inverse variance weighted-average ages are also displayed with one standard-error uncertainty.

## Supplementary References

- Ackert, R.P., Becker, R.A., Singer, B.S., Kurz, M.D., Caffee, M.W., and Mickelson, D.M., 2008, Patagonian glacier response during the Late Glacial-Holocene transition: *Science*, v. 321, p. 392-395.
- Balco, G., Stone, J.O., Lifton, N.A., and Dunai, T.J., 2008, A complete and easily accessible means of calculating surface exposure ages or erosion rate from  $^{10}\text{Be}$  and  $^{26}\text{Al}$  measurements: *Quaternary Geochronology*, v. 3, p. 174-195.
- Balco, G., Briner, J., Finkel, R.C., Rayburn, J.A., Ridge, J.C., and Schaefer, J.M., 2009, Regional beryllium-10 production rate calibration for late-glacial northeastern North America: *Quaternary Geochronology*, v. 4, p. 93-107.
- Balco, G., 2011, Contributions and unrealized potential contributions of cosmogenic-nuclide exposure dating to glacier chronology, 1990-2010: *Quaternary Science Reviews*, v. 30, p. 3-27.
- Bevington, P., and Robinson, D.K., 2002, *Data Reduction and Error Analysis for the Physical Sciences*, 3<sup>rd</sup> ed.: McGraw-Hill, Boston, 336 pp.
- Caldenius, C., 1932, Las glaciaciones Cuaternarias en la Patagonia y Tierra del Fuego: *Geografiska Annaler*, v. 14, p. 1-164.
- Crowley, T., 1992, North Atlantic Deep Water cools the Southern Hemisphere: *Paleoceanography*, v. 7, p. 489-497.
- Desilets, D., Zreda, M., and Prabu, T., 2006, Extended scaling factors for in situ cosmogenic nuclides: New measurements at low latitude: *Earth and Planetary Science Letters*, v. 246, p. 265-276.
- Douglass, D.C., Singer, B.S., Kaplan, M.R., Mickelson, D.M., and Caffee, M.W., 2006, Cosmogenic nuclide surface exposure dating of boulders on last-glacial and late-glacial moraines, Lago Buenos Aires, Argentina: Interpretive strategies and paleoclimate implications: *Quaternary Geochronology*, v. 1, p. 43-58.
- Dunai, T., 2001, Influence of secular variation of the magnetic field on production rates of in situ produced cosmogenic nuclides: *Earth and Planetary Science Letters*, v. 193, 197-212.
- Gosse, J.C., and Phillips, F.M., 2001, Terrestrial in situ cosmogenic nuclides: theory and application: *Quaternary Science Reviews*, v. 20, p. 1475-1560.
- Hulton, N., Sugden, D., Payne, A., and Clapperton, C., 1994, Glacier modeling and the climate of Patagonia during the Last Glacial Maximum: *Quaternary Research*, v. 42, p. 1-19.
- Huybers, P., and Denton, G., 2008, Antarctic temperature at orbital timescales controlled by local summer duration: *Nature Geoscience*, v. 1, p. 787-792.
- Joos, F., and Spahni, R., 2008, Rates of change in natural and anthropogenic radiative forcing over the past 20,000 years: *Proceedings of the National Academy of Sciences*, v. 105, p. 1425-1430.
- Kaplan, M.R., Strelin, J.A., Schaefer, J.M., Denton, G.H., Finkel, R.C., Schwartz, R., Putnam, A.E., Vandergoes, M.J., Goehring, B.M., and Travis, S.G., 2011, In-situ cosmogenic  $^{10}\text{Be}$  production rate at Lago Argentino, Patagonia: Implications for late-glacial climate chronology: *Earth and Planetary Science Letters*, v. 309, p. 21-32.
- Lal, D., 1991, Cosmic ray labeling of erosion surfaces: in situ nuclide production rates and erosion models: *Earth and Planetary Science Letters*, v. 104, p. 424-439.

- Lemieux-Dudon, B., Blayo, E., Petit, J., Waelbroeck, C., Svensson, A., Ritz, C., Barnola, J., Narcisi, B.M., and Parrenin, F., 2010, Consistent dating for Antarctic and Greenland ice cores: *Quaternary Science Reviews*, v. 29, p. 8-20.
- Lifton, N., Bieber, J., Clem, J., Duldig, M., Evenson, P., Humble, J., and Pyle, R., 2005, Addressing solar modulation and long-term uncertainties in scaling secondary cosmic rays for in situ cosmogenic nuclide applications: *Earth and Planetary Science Letters*, v. 239, p. 140-161.
- Liu, Z., Otto-Bliesner, B.L., He, F., Brady, E.C., Tomas, R., Clark, P.U., Carlson, A.E., Lynch-Stieglitz, J., Curry, W., Brook, E., Erickson, D., Jacob, R., Kutzbach, J., and Cheng, J., 2009, Transient simulation of last deglaciation with a new mechanism for Bølling-Allerød warming: *Science*, v. 325, p. 310-314.
- Mercer, J.H., 1976, Glacial history of southernmost South America: *Quaternary Research*, v. 6, p. 125-166.
- Nishiizumi, K., Winterer, E., Kohl, C., Klein, J., Middleton, R., Lal, D., and Arnold, J., 1989, Cosmic ray production rates of  $^{26}\text{Al}$  and  $^{10}\text{Be}$  in quartz from glacially polished rocks: *Journal of Geophysical Research*, v. 94, p. 17,907-17,915.
- Porter, S. C., 1975, Equilibrium-line altitudes of late Quaternary glaciers in the Southern Alps, New Zealand: *Quaternary Research*, v. 5, p. 27-47.
- Putnam, A.E., Schaefer, J.M., Barrell, D.J.A., Vandergoes, M., Denton, G.H., Kaplan, M.R., Finkel, R.C., Schwartz, R., Goehring, B.M., and Kelley, S.E., 2010, *In situ* cosmogenic  $^{10}\text{Be}$  production-rate calibration from the Southern Alps, New Zealand: *Quaternary Geochronology*, v. 5, p. 392-409.
- Stocker, T. F., 1998, The seesaw effect: *Science*, v. 281, 61-62.
- Stone, J. O., 2000, Air pressure and cosmogenic isotope production: *Journal of Geophysical Research*, v. 105, p. 23753-23759.
- Stott, L., Timmermann, A., and Thunell, R., 2007, Southern Hemisphere and Deep-Sea Warming Led Deglacial Atmospheric CO<sub>2</sub> Rise and Tropical Warming: *Science*, v. 318, p. 435-438.
- Strelin, J.A., and Malignino, E.C., 2000, Late-glacial history of Lago Argentino, Argentina, and age of the Puerto Bandera moraines: *Quaternary Research*, v. 54, p. 339-347.
- Strelin, J.A., Denton, G.H., Vandergoes, M.J., Ninnemann, U.S., and Putnam, A.E., 2011, Radiocarbon chronology of the late-glacial Puerto Bandera moraines, Southern Patagonian Icefield, Argentina: *Quaternary Science Reviews*, v. 30, p. 2551-2569.
- Stuefer, M., Rott, H., and Skvarca, P., 2007, Glacier Perito Moreno, Patagonia: climate sensitivities and glacier characteristics preceding the 2003/04 and 2005/06 damming events: *Journal of Glaciology*, v. 53, p. 3-16.
- Takeuchi, Y., Naruse, R., and Skvarca, P., 1996, Annual air-temperature measurement and ablation estimate at Moreno Glacier, Patagonia: *Bulletin of Glacier Research*, v. 14, p. 23-28.
- Wenzens, G., 1999, Fluctuations of outlet and valley glaciers in the southern Andes (Argentina) during the past 13,000 years: *Quaternary Research*, v. 51, p. 238-247.
